# Supplementary material for: Decadal-scale progression of the onset of Dansgaard–Oeschger warming events
Source: Copernicus journal article supplement (doi:10.5194/cp-15-811-2019), 2019-04-25
Supplement: Supplementary file 1 [file cp-15-811-2019-supplement.zip]

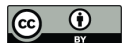

## *Supplement of*

# **Decadal-scale progression of the onset of Dansgaard–Oeschger warming events**

**Tobias Erhardt et al.**

*Correspondence to:* Tobias Erhardt ([erhardt@climate.unibe.ch](mailto:erhardt@climate.unibe.ch))

- [cp-15-811-2019-supplement-title-page.pdf](#)
- results
  - NEEM\_lags.csv
  - NEEM\_timing.csv
  - NGRIP\_lags.csv
  - NGRIP\_timing.csv
  - README.md

The copyright of individual parts of the supplement might differ from the CC BY 4.0 License.
